# Supplementary material for: Assessment of complications and success rates of Percutaneous nephrolithotomy: single tract vs. multi tract approaches
Source: PeerJ. 2025 Jan 16;13:e18450. doi: 10.7717/peerj.18450 (PMC11742455; doi:10.7717/peerj.18450)
Supplement: Supplemental Information 1 [file peerj-13-18450-s001.xlsx]

## Sheet: Sayfa1
Nu.	Multitract /Singletract	Gender	Age (years)	BMI (kg/m2)	Stone Location	Laterality	Stone Burden	Hounsfield Units	Preoperative HGB levels (g/dl)	Postoperative HGB levels (g/dl)	HGB drop	Blood Transfusion	Total fluoroscopy time (min)	Total operation time (min)	Time to nephrostomy catheter removal (day)	Hospital stay length (day)	Stone Free	History of ipsilateral Open Nephrolithotomy	History of ipsilateral ESWL	History of ipsilateral PCNL	History of ipsilateral URS/RIRS	History of ipsilateral renal any surgery	Guy’s stone score	Hydronephrosis grade	ASA score	DM	HT
1	Singletract	Male	32	20	Pelvic and calix	Right	609	1456	17.7	15.4	2.3	0	1.12	53	2	2	SF	0	0	0	0	0	2	1	1	0	0
2	Singletract	Male	39	23	Pelvic and calix	Right	543	1364	14.8	13	1.8	0	1.02	53	2	4	SF	0	1	0	1	1	2	1	1	0	0
3	Singletract	Male	66	22	Pelvic and calix	Left	740	1100	15	13.4	1.6	0	1.07	61	4	3	SF	0	0	0	0	0	2	1	1	0	0
4	Singletract	Male	73	28	Pelvic and calix	Left	1270	521	14.8	14.5	0.3	0	1.12	120	3	2	SF	0	0	0	0	0	3	2	2	0	1
5	Singletract	Female	57	19	Pelvic and calix	Right	184	789	17.6	16.8	0.8	0	0.75	22	2	3	SF	0	1	0	1	1	2	1	1	0	0
6	Singletract	Female	51	26	Pelvic and calix	Left	318	829	15.8	14.1	1.7	0	0.72	32	3	4	SF	0	0	0	0	0	2	1	2	0	0
7	Singletract	Female	53	26	Pelvic and calix	Left	1038	745	15.4	13.2	2.2	0	1.33	98	3	1	SF	0	1	1	0	1	3	1	2	0	0
8	Singletract	Male	34	23	multiple calyces	Right	170	674	15.4	12.6	2.8	0	1.33	24	0	3	SF	0	0	0	0	0	2	1	1	0	0
9	Singletract	Male	50	22	Pelvic and calix	Left	423	1392	14.6	12.4	2.2	0	1.82	38	3	5	SF	0	1	0	1	1	2	1	1	0	0
10	Singletract	Male	41	26	Pelvic and calix	Right	543	651	13.8	12.4	1.4	0	1.17	52	2	5	CSRF	0	0	0	0	0	2	1	1	0	0
11	Singletract	Female	44	30	Pelvic and calix	Right	737	872	14.7	13.2	1.5	0	0.98	60	2	3	SF	0	0	0	0	0	2	1	2	0	0
12	Singletract	Female	57	29	Pelvic and calix	Right	1175	1471	14.6	13.8	0.8	0	1.45	125	1	4	CSRF	0	0	0	0	0	3	2	2	1	0
13	Singletract	Female	38	22	Pelvic and calix	Left	270	1078	16.8	14.7	2.1	0	1.85	26	4	2	SF	0	0	0	0	0	2	1	1	0	0
14	Singletract	Male	65	26	Pelvic and calix	Left	1806	1014	15.4	13.8	1.6	0	1.97	138	3	6	SF	0	0	0	0	0	3	2	2	0	1
15	Singletract	Female	53	25	Pelvic and calix	Right	543	1157	14.3	12.5	1.8	0	0.85	49	2	3	SF	0	1	0	1	1	2	1	1	0	0
16	Singletract	Male	57	28	Staghorn	Left	2303	834	13.1	11.6	1.5	0	2.38	145	3	4	SF	0	0	0	0	0	4	0	2	0	0
17	Singletract	Male	58	24	Staghorn	Left	1177	1045	13.2	11.4	1.8	0	2.58	86	4	5	CSRF	0	0	0	0	0	4	2	2	0	0
18	Singletract	Male	62	29	Pelvic and calix	Left	753	1603	12	9.6	2.4	0	0.87	61	4	3	SF	0	0	0	0	0	2	1	3	1	1
19	Singletract	Male	52	21	Pelvic and calix	Right	543	928	11.4	9.6	1.8	0	1.52	48	4	5	SF	0	0	0	0	0	2	1	2	0	0
20	Singletract	Male	44	22	Pelvic and calix	Right	395	1332	12.5	9.7	2.8	1	0.75	31	4	4	SF	0	0	0	0	0	2	2	1	0	0
21	Singletract	Male	41	21	multiple calyces	Left	952	1884	14.5	14.2	0.3	0	0.95	75	3	3	CSRF	0	1	0	1	1	2	0	1	0	0
22	Singletract	Male	47	23	Pelvic and calix	Right	1371	1206	14.1	13.4	0.7	0	2.18	104	2	3	SF	0	1	0	1	1	3	2	1	0	0
23	Singletract	Male	48	28	Pelvic and calix	Right	423	1204	15.1	13.6	1.5	0	1.4	40	3	4	SF	0	0	0	0	0	2	1	2	0	0
24	Singletract	Female	56	27	Pelvic and calix	Right	543	1090	15.5	14.5	1	0	1.15	49	2	2	SF	1	0	0	0	1	1	1	2	0	0
25	Singletract	Male	50	26	Pelvic and calix	Left	869	1178	13.8	10.1	3.7	1	0.73	78	4	2	SF	0	1	0	1	1	2	1	1	0	0
26	Singletract	Male	42	29	Pelvic and calix	Right	455	1653	15	14.6	0.4	0	1.48	42	4	2	SF	0	0	0	0	0	2	2	2	1	0
27	Singletract	Male	63	21	Pelvic and calix	Left	565	1700	15.1	14.5	0.6	0	0.8	50	3	2	SF	0	0	0	0	0	2	1	1	0	0
28	Singletract	Male	29	24	Pelvic and calix	Left	481	590	13.4	12.9	0.5	0	0.98	51	2	2	SF	0	0	0	0	0	2	1	1	0	0
29	Singletract	Male	42	28	Pelvic and calix	Left	910	1520	15	13.2	1.8	0	1.63	74	4	5	SF	0	0	0	0	0	2	2	1	0	0
30	Singletract	Male	37	26	Pelvic and calix	Left	188	1517	12.3	10.6	1.7	0	1.03	24	3	4	SF	0	0	0	0	0	2	1	1	0	0
31	Singletract	Male	53	28	Staghorn	Left	3395	682	14.2	13	1.2	0	3.8	215	2	4	SF	1	0	0	0	1	4	2	2	0	1
32	Singletract	Male	53	26	Staghorn	Right	2303	1086	15	14.6	0.4	0	1.37	185	2	2	CSRF	0	0	0	0	0	4	0	2	0	0
33	Singletract	Male	59	23	Pelvic and calix	Right	543	1370	14.2	13.1	1.1	0	1.57	50	2	4	SF	0	0	0	0	0	1	1	1	0	0
34	Singletract	Male	62	22	Pelvic and calix	Left	294	1090	15.7	15	0.7	0	0.83	30	3	2	SF	0	0	0	0	0	2	1	2	0	0
35	Singletract	Male	29	21	Pelvic and calix	Right	368	837	13.6	11.2	2.4	0	1.37	43	4	2	SF	0	1	1	0	1	2	1	1	0	0
36	Singletract	Male	44	22	Pelvic and calix	Left	248	746	13	11.6	1.4	0	1.42	21	3	3	SF	1	0	0	0	1	2	2	1	0	0
37	Singletract	Male	52	25	Pelvic and calix	Right	576	1115	10.5	9.2	1.3	0	1.5	50	2	3	SF	1	0	0	0	1	3	3	2	0	0
38	Singletract	Female	20	27	Pelvic and calix	Right	300	1200	15.8	14.8	1	0	1.35	32	4	4	SF	0	0	0	0	0	2	1	1	0	0
39	Singletract	Female	32	27	Staghorn	Left	1083	458	15.6	14.9	0.7	0	3.2	73	3	2	CSRF	0	1	0	1	1	4	1	1	0	0
40	Singletract	Male	69	25	multiple calyces	Left	368	460	14.5	12.1	2.4	0	0.68	31	1	3	SF	0	1	1	0	1	3	0	2	0	1
41	Singletract	Male	56	29	Pelvic and calix	Right	643	1315	13.4	11.6	1.8	0	1.12	62	4	3	CSRF	0	0	0	0	0	2	2	2	1	0
42	Singletract	Male	53	21	Pelvic and calix	Right	481	802	15.4	14.4	1	0	1.12	42	2	4	SF	0	1	0	1	1	2	1	1	0	0
43	Singletract	Female	32	21	Pelvic and calix	Right	829	1209	15.6	11.4	4.2	1	1.47	78	3	4	SF	0	1	0	1	1	2	1	1	0	0
44	Singletract	Male	54	26	Pelvic and calix	Right	395	1075	16	14	2	0	1.08	52	4	3	SF	0	0	0	0	0	2	1	2	0	0
45	Singletract	Male	39	26	Pelvic and calix	Left	543	1045	14.9	12.6	2.3	0	0.8	54	3	4	CSRF	0	0	0	0	0	2	2	1	0	0
46	Singletract	Male	52	25	Pelvic and calix	Right	1692	499	12.5	11.2	1.3	0	1.88	131	2	3	SF	0	0	0	0	0	3	2	1	0	0
47	Singletract	Male	41	24	Staghorn	Left	1692	1158	14.6	12.1	2.5	0	1.55	121	2	5	CSRF	0	0	0	0	0	4	3	1	0	0
48	Singletract	Male	68	25	Pelvic and calix	Left	609	1182	17.4	15.8	1.6	0	1.35	56	4	5	SF	0	0	0	0	0	2	0	2	0	0
49	Singletract	Male	45	27	Staghorn	Left	1584	1164	14.4	13.2	1.2	0	1.33	155	3	5	CSRF	1	0	1	0	1	4	2	1	0	0
50	Singletract	Female	33	29	Pelvic and calix	Right	321	1453	12.6	12.3	0.3	0	0.95	41	2	2	SF	0	1	0	1	1	2	1	1	0	0
51	Singletract	Male	51	30	Pelvic and calix	Right	544	1439	14.2	11.7	2.5	0	0.92	43	0	4	SF	0	0	0	0	0	2	2	3	1	0
52	Singletract	Male	34	33	multiple calyces	Left	395	1423	13.2	12.1	1.1	0	1.68	44	3	5	SF	0	1	0	1	1	3	0	2	1	0
53	Singletract	Male	47	29	Staghorn	Left	1581	1221	12.7	9.9	2.8	0	1.35	124	2	4	CSRF	0	0	0	0	0	4	0	2	1	0
54	Singletract	Male	45	23	Pelvic and calix	Right	575	1490	14.7	13.2	1.5	0	0.98	42	2	2	SF	0	0	0	0	0	2	2	1	0	0
55	Singletract	Male	43	22	Pelvic and calix	Left	1175	420	15.8	12.6	3.2	0	1.22	115	0	4	CSRF	0	1	0	1	1	3	2	1	0	0
56	Singletract	Male	58	23	multiple calyces	Left	294	877	12.6	12.4	0.2	0	1.53	27	3	5	SF	0	0	0	0	0	2	2	1	0	0
57	Singletract	Male	56	23	Pelvic and calix	Left	869	1087	15	12.2	2.8	0	1.33	75	4	2	SF	0	0	0	0	0	2	2	1	0	0
58	Singletract	Male	26	22	Pelvic and calix	Left	543	1159	17.5	16	1.5	0	1.15	53	3	2	SF	0	0	0	0	0	2	0	1	0	0
59	Singletract	Male	48	21	Pelvic and calix	Left	609	1358	14.1	13.6	0.5	0	0.87	51	2	2	SF	0	1	0	1	1	2	2	1	0	0
60	Singletract	Female	50	26	Staghorn	Left	2933	1127	16.7	14.5	2.2	0	2.78	185	3	4	CSRF	0	0	0	0	0	4	2	2	0	0
61	Singletract	Male	30	27	Staghorn	Right	1152	566	12.8	11.6	1.2	0	0.93	84	2	3	SF	0	0	0	0	0	4	2	1	0	0
62	Singletract	Female	26	25	Staghorn	Left	829	1015	14	13.1	0.9	0	0.88	73	2	3	SF	0	0	0	0	0	4	1	1	0	0
63	Singletract	Male	74	27	Pelvic and calix	Left	188	1079	15.2	14	1.2	0	0.68	34	3	4	SF	0	1	0	1	1	2	1	3	0	1
64	Singletract	Male	71	28	Pelvic and calix	Right	752	1523	13.9	12.8	1.1	0	1.13	72	4	4	SF	0	0	0	0	0	2	1	2	0	1
65	Singletract	Male	68	29	Pelvic and calix	Left	543	931	15.2	14.7	0.5	0	0.93	48	2	3	SF	0	0	0	0	0	2	2	3	1	1
66	Singletract	Female	56	29	Pelvic and calix	Right	293	1301	15.4	14.6	0.8	0	0.68	32	3	2	SF	0	0	0	0	0	2	1	2	1	0
67	Singletract	Male	51	21	Pelvic and calix	Left	830	437	13.8	12.1	1.7	0	1.07	67	3	2	SF	0	0	0	0	0	3	0	1	0	0
68	Singletract	Female	43	24	Pelvic and calix	Right	1371	1054	14.3	12.4	1.9	0	1.18	99	3	2	SF	0	1	0	1	1	3	2	1	0	0
69	Singletract	Female	20	27	Staghorn	Left	1474	1231	12.7	11.7	1	0	1.42	109	4	2	SF	0	0	0	0	0	4	2	1	0	0
70	Singletract	Female	67	27	Pelvic and calix	Right	227	1945	15.3	12.2	3.1	0	0.92	21		2	SF	0	1	0	1	1	2	1	2	0	1
71	Singletract	Female	41	25	Pelvic and calix	Right	423	1402	14.6	12.9	1.7	0	0.98	36	3	4	SF	0	0	0	0	0	2	1	1	0	0
72	Singletract	Male	36	21	Pelvic and calix	Right	952	1612	13.4	13.4	0	0	1.25	67	2	4	CSRF	1	0	0	0	1	2	2	1	0	0
73	Singletract	Male	37	22	Pelvic and calix	Right	883	1452	15	13.7	1.3	0	2.13	73		3	SF	1	0	1	0	1	2	2	1	0	0
74	Singletract	Male	57	25	Pelvic and calix	Left	752	1655	16.7	13.3	3.4	0	1.43	71	2	2	CSRF	0	0	0	0	0	2	1	1	0	0
75	Singletract	Male	48	25	Pelvic and calix	Left	1038	1164	16.7	15.8	0.9	0	1.15	84	2	1	CSRF	0	1	0	1	1	2	1	1	0	0
76	Singletract	Female	58	29	Staghorn	Left	968	418	17	14.8	2.2	0	3.92	114	2	7	SF	1	0	0	1	1	4	3	3	1	0
77	Singletract	Male	49	31	Pelvic and calix	Right	294	1436	13.6	13.2	0.4	0	0.65	35		4	SF	0	0	0	0	0	2	1	3	1	0
78	Singletract	Male	56	25	Pelvic and calix	Right	752	1422	11.8	9.8	2	0	1.33	67	2	5	CSRF	0	0	0	0	0	2	2	2	0	0
79	Singletract	Male	63	22	Pelvic and calix	Left	482	1536	14	13.6	0.4	0	0.75	40	4	3	SF	0	0	0	0	0	2	2	2	0	1
80	Singletract	Male	48	23	Pelvic and calix	Left	343	536	15.8	14.8	1	0	1.68	33	3	3	SF	0	0	0	0	0	2	1	1	0	0
81	Singletract	Male	43	26	Pelvic and calix	Left	200	1431	15	10.4	4.6	1	0.95	19	4	3	SF	0	0	0	0	0	2	1	1	0	0
82	Singletract	Male	39	27	Staghorn	Left	1128	2013	13.7	12.6	1.1	0	3.27	110	4	2	CSRF	0	0	0	0	0	4	1	1	0	0
83	Singletract	Male	40	28	Staghorn	Left	2119	566	15.2	13.2	2	0	2.35	160	2	4	SF	0	0	0	0	0	4	2	1	0	0
84	Singletract	Female	45	24	Pelvic and calix	Left	423	1210	13.1	12.3	0.8	0	1.35	41	3	3	SF	0	1	0	1	1	2	0	1	0	0
85	Singletract	Male	72	26	Pelvic and calix	Right	293	727	12.8	11.8	1	0	1.15	34	2	2	SF	0	0	0	0	0	2	1	3	0	1
86	Singletract	Male	19	24	multiple calyces	Left	752	897	16.1	14.7	1.4	0	1.38	73	2	6	CSRF	0	0	0	0	0	3	0	1	0	0
87	Singletract	Male	53	23	multiple calyces	Left	317	2100	12.9	10.5	2.4	0	1.32	34	3	5	SF	0	0	0	0	0	2	0	1	0	0
88	Singletract	Male	48	24	Staghorn	Left	1150	946	12.2	11.7	0.5	0	3.8	173	2	4	CSRF	0	0	0	0	0	4	1	1	0	0
89	Singletract	Male	69	21	Pelvic and calix	Left	423	1880	14.5	13.6	0.9	0	1.52	45	2	4	SF	0	0	0	0	0	2	1	1	0	0
90	Singletract	Male	65	19	Pelvic and calix	Left	952	1200	14.5	14.2	0.3	0	2.23	90	2	4	SF	0	0	0	0	0	2	2	1	0	0
91	Singletract	Male	33	19	multiple calyces	Right	1422	1532	12.2	11.8	0.4	0	2.6	125	2	5	CSRF	0	0	0	0	0	3	0	1	0	0
92	Singletract	Male	63	26	Pelvic and calix	Left	680	1100	14.3	13.9	0.4	0	1.47	67	4	3	CSRF	1	0	0	0	1	2	1	2	0	1
93	Singletract	Male	36	28	Pelvic and calix	Left	679	1472	10.5	9.3	1.2	0	1.12	73	4	5	SF	0	0	0	0	0	2	1	1	0	0
94	Singletract	Female	65	25	Staghorn	Right	2177	1077	11.7	10.1	1.6	0	4.4	180	2	4	SF	0	1	0	1	1	4	2	2	0	1
95	Singletract	Male	46	25	Pelvic and calix	Right	643	1885	15.5	13.4	2.1	0	1.15	65	2	3	SF	0	0	0	0	0	2	1	1	0	0
96	Singletract	Male	30	25	Pelvic and calix	Left	1139	1934	13.5	12	1.5	0	1.87	95	4	4	CSRF	0	0	0	0	0	2	1	1	0	0
97	Singletract	Male	66	24	Pelvic and calix	Left	543	1115	13	11.4	1.6	0	1.68	60	3	2	SF	1	0	0	0	1	1	1	2	0	0
98	Singletract	Male	50	22	Staghorn	Right	752	1068	12.1	9.7	2.4	0	1.32	78	3	5	SF	0	0	0	0	0	4	2	1	0	0
99	Singletract	Male	63	25	Pelvic and calix	Right	1083	1318	14.9	13.2	1.7	0	1.37	96	3	5	SF	0	1	0	1	1	2	1	2	0	1
100	Singletract	Male	42	21	Pelvic and calix	Left	1175	1749	17.7	16.9	0.8	0	1.63	105	3	4	CSRF	0	0	0	0	0	2	2	1	0	0
101	Singletract	Male	59	22	Pelvic and calix	Left	952	1886	15.6	13.2	2.4	0	2.1	86	5	4	CSRF	1	0	0	0	1	2	2	1	0	0
102	Singletract	Male	54	20	Pelvic and calix	Right	395	1211	15.1	12.7	2.4	0	1.82	45		3	SF	0	0	0	0	0	2	1	1	0	0
103	Singletract	Male	42	19	Pelvic and calix	Left	512	1138	15.8	13.6	2.2	0	1.63	54	2	3	SF	0	0	0	0	0	2	1	1	0	0
104	Singletract	Male	37	26	Staghorn	Left	829	1683	13.1	12.1	1	0	1.47	90	3	5	SF	0	0	0	0	0	4	1	1	0	0
105	Singletract	Male	73	25	Pelvic and calix	Left	1177	1344	13.9	12.8	1.1	0	3.62	97	3	4	CSRF	0	0	0	0	0	3	2	2	0	1
106	Singletract	Male	82	24	Staghorn	Left	1177	1300	15.3	13.7	1.6	0	2.3	100	2	4	SF	0	0	0	0	0	4	2	2	0	1
107	Singletract	Male	43	23	Pelvic and calix	Right	610	1435	15.6	15	0.6	0	1.25	67	3	6	SF	0	0	0	0	0	2	2	1	0	0
108	Singletract	Male	43	24	Pelvic and calix	Right	610	1435	15.7	14.6	1.1	0	1.25	59	2	6	SF	0	0	0	0	0	2	1	1	0	0
109	Singletract	Female	57	26	Pelvic and calix	Left	847	1312	14.7	13.1	1.6	0	1.2	81	4	3	SF	0	1	0	1	1	2	1	2	0	0
110	Singletract	Male	46	25	Staghorn	Right	1371	1422	14.2	12.4	1.8	0	2.52	118	4	4	CSRF	0	0	0	0	0	4	2	1	0	0
111	Singletract	Male	36	27	Pelvic and calix	Left	249	929	11.8	11	0.8	0	1.97	31	3	3	CSRF	0	0	0	0	0	2	1	1	0	0
112	Singletract	Male	32	21	Pelvic and calix	Right	423	1161	14.5	13.5	1	0	1.17	47	4	3	SF	0	0	0	0	0	1	1	1	0	0
113	Singletract	Male	18	22	Staghorn	Right	995	1920	15.6	13.5	2.1	0	3.38	88	2	5	SF	0	0	0	0	0	4	1	1	0	0
114	Singletract	Male	19	27	Staghorn	Right	1175	1521	15.3	13.2	2.1	0	2.15	95	2	4	CSRF	0	0	0	0	0	4	2	1	0	0
115	Singletract	Male	25	27	Pelvic and calix	Right	565	931	17	15.2	1.8	0	1.2	51	3	14	SF	1	0	0	0	1	2	1	1	0	0
116	Singletract	Male	67	25	Pelvic and calix	Left	1581	731	15.4	9.8	5.6	1	1.52	150	3	3	SF	0	0	0	0	0	2	2	2	0	0
117	Singletract	Male	63	24	Pelvic and calix	Left	276	1794	15.9	14	1.9	0	1.73	23	1	7	SF	0	1	0	1	1	2	1	2	0	1
118	Singletract	Male	66	27	multiple calyces	Left	543	563	14.8	12.7	2.1	0	2.3	48	3	4	SF	0	1	0	1	1	3	2	2	0	1
119	Singletract	Male	43	25	Pelvic and calix	Right	188	1100	16.8	14.9	1.9	0	3.45	26	4	2	SF	0	1	0	1	1	2	1	1	0	0
120	Singletract	Male	69	23	Staghorn	Left	1581	1088	13.1	12.7	0.4	0	1.87	147	3	3	CSRF	0	1	0	1	1	4	2	1	0	0
121	Singletract	Female	55	22	Pelvic and calix	Left	423	545	12	10.5	1.5	0	1.73	47	2	2	CSRF	0	0	0	0	0	2	1	1	0	0
122	Singletract	Female	57	23	Staghorn	Right	952	1624	13	12.1	0.9	0	1.32	87	3	6	CSRF	0	0	0	0	0	4	1	1	0	0
123	Singletract	Male	33	23	Pelvic and calix	Left	423	1600	14.7	13.4	1.3	0	1.78	43	2	4	SF	0	0	0	0	0	2	2	1	0	0
124	Singletract	Male	43	28	Pelvic and calix	Left	481	932	13.2	11.4	1.8	0	3.23	47	2	4	CSRF	0	0	0	0	0	2	1	1	0	0
125	Singletract	Male	23	26	Staghorn	Left	1749	670	11.4	7.6	3.8	1	2.27	175	2	4	CSRF	0	0	0	0	0	4	2	1	0	0
126	Singletract	Female	63	23	Pelvic and calix	Right	610	1093	16.4	9.6	6.8	1	1.07	63	2	2	SF	0	0	0	0	0	2	0	2	0	1
127	Singletract	Male	59	24	Pelvic and calix	Left	423	779	13.8	11.4	2.4	0	1.67	57	3	4	SF	0	0	0	0	0	2	1	2	0	0
128	Singletract	Male	62	23	Pelvic and calix	Left	643	1156	12.4	7.7	4.7	0	1.72	71	4	5	SF	1	0	0	0	1	2	1	2	0	0
129	Singletract	Male	30	24	Pelvic and calix	Left	481	2006	12.6	9.4	3.2	1	1.5	52	3	3	SF	0	0	0	0	0	2	1	1	0	0
130	Singletract	Male	46	26	Pelvic and calix	Right	543	1185	11.7	10.2	1.5	0	1.62	57	3	3	SF	0	0	0	0	0	2	1	2	0	0
131	Singletract	Female	51	23	multiple calyces	Left	152	1008	13.3	11.8	1.5	0	1.43	33	3	3	SF	0	0	0	0	0	2	0	1	0	0
132	Singletract	Male	44	26	Pelvic and calix	Left	3815	652	14.8	13.3	1.5	0	2.35	235	4	3	SF	0	0	0	0	0	2	2	1	0	0
133	Singletract	Male	49	24	Pelvic and calix	Right	423	1427	13.5	8.9	4.6	1	1.57	61	4	3	SF	0	1	0	1	1	2	1	1	0	0
134	Singletract	Female	57	19	Pelvic and calix	Right	423	1067	13.5	13.2	0.3	0	1.5	46		2	SF	0	0	0	0	0	2	1	1	0	0
135	Singletract	Male	62	23	Pelvic and calix	Left	452	1433	12.4	9.9	2.5	0	1.83	47	3	3	SF	0	0	0	0	0	2	1	2	0	0
136	Singletract	Male	38	24	Pelvic and calix	Right	640	1788	12.4	10.4	2	0	1.4	64	2	5	SF	0	0	0	0	0	2	2	1	0	0
137	Singletract	Female	51	25	Pelvic and calix	Left	1477	1803	11.8	10.1	1.7	0	3.68	136	4	4	SF	0	0	0	0	0	3	3	2	0	0
138	Singletract	Male	51	24	Pelvic and calix	Right	543	1125	14.1	11.8	2.3	0	1.85	55	2	3	SF	0	0	0	0	0	2	1	1	0	0
139	Singletract	Female	50	26	Pelvic and calix	Left	343	928	13.8	12.9	0.9	0	1.05	37	3	3	SF	0	1	0	1	1	2	1	2	0	0
140	Singletract	Female	36	24	Pelvic and calix	Right	271	1196	15.4	11.1	4.3	1	1.47	39	4	5	SF	0	1	0	1	1	2	1	1	0	0
141	Singletract	Female	25	26	Pelvic and calix	Right	1300	1345	13.6	12.3	1.3	0	2.35	132	3	4	SF	0	0	0	0	0	2	2	1	0	0
142	Singletract	Male	70	28	Staghorn	Left	3008	1126	13.4	9.6	3.8	1	4.4	197	2	6	CSRF	0	0	0	0	0	4	2	2	0	1
143	Singletract	Female	37	25	Pelvic and calix	Right	1107	1573	13	12	1	0	1.78	113	2	4	CSRF	0	0	0	0	0	2	1	1	0	0
144	Singletract	Male	57	22	Pelvic and calix	Left	423	935	15.4	12.4	3	0	1.37	47	0	2	SF	0	0	0	0	0	2	2	1	0	0
145	Singletract	Male	41	21	multiple calyces	Right	1692	1336	16.7	13.3	3.4	0	3.07	165	3	7	SF	0	0	0	0	0	2	2	1	0	0
146	Singletract	Female	64	25	Pelvic and calix	Right	294	1671	14.2	12.4	1.8	0	1.4	35	3	4	SF	0	0	0	0	0	2	1	2	0	1
147	Singletract	Male	48	23	Pelvic and calix	Right	452	1960	16	14.4	1.6	0	1.7	46	2	4	SF	0	0	0	0	0	2	1	1	0	0
148	Singletract	Male	55	28	Pelvic and calix	Left	575	839	14.9	13.2	1.7	0	1.28	59	0	3	SF	0	0	0	0	0	2	2	2	0	1
149	Singletract	Male	22	25	Pelvic and calix	Left	105	1300	11.2	10.4	0.8	0	1.35	26	3	3	SF	0	0	0	0	0	2	1	1	0	0
150	Singletract	Male	60	26	Pelvic and calix	Right	342	1264	14.6	13.1	1.5	0	1.27	41	2	2	SF	0	0	0	0	0	2	1	2	0	1
151	Singletract	Male	49	22	Staghorn	Right	1474	1469	19.4	13	6.4	1	2.13	117	2	5	CSRF	0	0	0	0	0	4	2	1	0	0
152	Singletract	Male	61	24	Pelvic and calix	Right	995	1375	14.4	12.1	2.3	0	1.25	85	2	5	CSRF	0	0	0	0	0	2	1	1	0	0
153	Singletract	Male	50	24	Pelvic and calix	Right	109	1100	14	12.8	1.2	0	1.4	28	2	5	SF	0	0	0	0	0	2	2	1	0	0
154	Singletract	Male	44	23	Staghorn	Left	2303	598	12.3	11.5	0.8	0	1.92	172	3	4	SF	0	0	0	0	0	4	2	1	0	0
155	Singletract	Male	62	21	Pelvic and calix	Left	271	1230	15	10.3	4.7	0	1.67	33	3	3	SF	1	0	0	0	1	2	1	1	0	0
156	Singletract	Male	82	19	Pelvic and calix	Right	1128	348	13.2	12.7	0.5	0	2.18	97	2	6	SF	0	0	0	0	0	2	1	2	0	1
157	Singletract	Male	41	25	multiple calyces	Left	747	1400	15.7	14.4	1.3	0	3.68	58	3	4	SF	0	0	0	0	0	3	0	1	0	0
158	Multitract	Male	62	20	Pelvic and calix	Left	423	1423	14.3	12.2	2.1	0	4	95	2	4	SF	0	1	0	1	1	2	1	2	0	0
159	Multitract	Female	69	24	Pelvic and calix	Left	753	1733	14.2	13.8	0.4	0	8	120	3	9	SF	0	0	0	0	0	3	3	2	0	1
160	Multitract	Male	55	23	Pelvic and calix	Right	1373	1503	16.2	15	1.2	0	5	140	2	3	CSRF	0	0	0	0	0	2	3	1	0	0
161	Multitract	Female	62	25	Pelvic and calix	Left	911	1234	11.9	10.4	1.5	0	5	100	3	7	SF	0	0	0	0	0	3	2	2	0	1
162	Multitract	Male	58	23	Staghorn	Left	2579	587	15.5	12.4	3.1	0	5	110	3	5	SF	0	0	0	0	0	4	2	1	0	0
163	Multitract	Female	38	29	Pelvic and calix	Right	249	1376	11.4	10.5	0.9	0	9	120	3	4	SF	0	1	0	1	1	2	0	1	0	0
164	Multitract	Female	50	27	Pelvic and calix	Left	600	1100	11.8	11	0.8	0	1.5	120	4	2	SF	0	0	0	0	0	3	2	2	0	1
165	Multitract	Female	42	25	Pelvic and calix	Right	415	985	12.6	9.1	3.5	1	7	80	2	4	CSRF	0	0	0	0	0	2	1	1	0	0
166	Multitract	Male	70	22	Pelvic and calix	Right	1085	1810	13.4	12.1	1.3	0	4	100	1	4	SF	0	0	0	0	0	2	1	2	0	1
167	Multitract	Male	57	21	Pelvic and calix	Right	610	790	14.7	13.6	1.1	0	3	90		3	SF	0	0	0	0	0	3	2	1	0	0
168	Multitract	Male	45	20	Pelvic and calix	Left	282	1220	15.4	12.9	2.5	0	6	90	4	3	SF	0	1	0	1	1	2	1	1	0	0
169	Multitract	Male	43	24	Pelvic and calix	Right	1100	1380	14.8	13.3	1.5	0	6	150	3	3	SF	0	0	0	0	0	3	2	1	0	0
170	Multitract	Male	59	23	Pelvic and calix	Left	610	1100	15.3	13.8	1.5	0	8	55	3	3	SF	0	0	0	0	0	3	3	2	0	0
171	Multitract	Male	38	21	Staghorn	Left	1125	1800	15.8	11.8	4	1	10	165	6	10	SF	0	0	0	0	0	4	2	1	0	0
172	Multitract	Male	44	22	multiple calyces	Left	600	1400	14.9	11.6	3.3	0	9	60	2	5	SF	0	0	0	0	0	2	1	1	0	0
173	Multitract	Female	66	21	multiple calyces	Left	250	1750	13	11.7	1.3	0	7	45	5	4	SF	0	0	0	0	0	2	0	1	0	0
174	Multitract	Male	50	24	Staghorn	Right	720	1977	14.1	12.1	2	0	3	90	3	4	SF	0	0	0	0	0	4	2	1	0	0
175	Multitract	Male	38	21	Staghorn	Right	720	1750	15.4	11.2	4.2	0	4	80	5	5	SF	0	0	0	0	0	4	2	1	0	0
176	Multitract	Male	54	27	multiple calyces	Right	600	1600	14.9	13.2	1.7	0	7	80	0	4	SF	0	0	0	0	0	3	2	2	0	0
177	Multitract	Male	83	27	Staghorn	Right	1620	1600	14.6	12.1	2.5	0	7	90	2	5	SF	0	0	0	0	0	4	2	2	0	1
178	Multitract	Male	49	23	Staghorn	Right	1620	1600	13.5	12	1.5	0	9	70	2	4	SF	0	1	0	1	1	4	2	1	0	0
179	Multitract	Male	46	23	Staghorn	Right	500	1238	14.7	12.2	2.5	0	5	100	2	3	SF	0	0	0	0	0	4	1	1	0	0
180	Multitract	Male	49	28	Pelvic and calix	Left	200	700	16	13.5	2.5	0	5	60	3	3	SF	0	1	0	1	1	2	0	2	0	0
181	Multitract	Male	68	25	Staghorn	Left	450	1853	12.6	12.1	0.5	0	4	70	3	2	SF	0	0	0	0	0	4	1	2	0	0
182	Multitract	Male	59	29	Staghorn	Left	1177	1130	15.3	14.1	1.2	0	8	90	4	4	CSRF	0	0	0	0	0	4	2	3	1	1
183	Multitract	Male	69	27	Staghorn	Left	423	626	14.5	12.9	1.6	0	7	80	2	4	SF	0	1	0	1	1	4	1	2	0	1
184	Multitract	Female	37	25	multiple calyces	Right	610	656	11	9.3	1.7	0	4	80	3	4	SF	0	0	0	0	0	2	1	1	0	0
185	Multitract	Male	22	24	multiple calyces	Left	200	1436	16.8	14.2	2.6	0	3	70	2	4	SF	0	1	1	0	1	2	0	1	0	0
186	Multitract	Male	51	28	multiple calyces	Left	550	1843	14.6	13.8	0.8	0	4	60	3	3	SF	0	0	0	0	0	2	1	2	0	0
187	Multitract	Male	48	25	multiple calyces	Right	480	1020	13.8	11.9	1.9	0	8	70	3	4	SF	0	1	0	1	1	3	1	1	0	0
188	Singletract	Female	18	25	multiple calyces	Right	590	496	12.3	10.6	1.7	0	6	50	2	3	SF	0	0	0	0	0	3	1	1	0	0
189	Multitract	Male	51	27	Pelvic and calix	Left	680	1132	17	14.6	2.4	0	5	75	3	4	CSRF	0	0	0	0	0	2	1	2	0	0
190	Multitract	Male	56	27	Pelvic and calix	Right	271	839	15.4	11.3	4.1	1	7	55	4	5	CSRF	0	0	0	0	0	2	1	2	0	0
191	Multitract	Male	48	29	Pelvic and calix	Left	1177	1950	15.6	13.2	2.4	0	8	150	3	5	SF	0	0	0	0	0	2	2	3	1	1
192	Multitract	Male	28	24	Pelvic and calix	Left	460	786	16.3	14	2.3	0	4	105	4	4	SF	0	0	0	0	0	2	1	1	0	0
193	Multitract	Male	36	22	Pelvic and calix	Right	941	1700	13.4	11.2	2.2	1	8	80	3	6	SF	0	0	0	0	0	2	3	1	0	0
194	Multitract	Male	61	19	Pelvic and calix	Left	1177	606	13.4	11.2	2.2	0	7	75	3	3	CSRF	0	0	0	0	0	2	2	1	0	0
195	Multitract	Male	33	23	Pelvic and calix	Right	310	1450	16.7	13.3	3.4	1	7	130	3	6	CSRF	0	0	0	0	0	3	1	1	0	0
196	Multitract	Male	48	22	Pelvic and calix	Left	770	628	15.9	12.4	3.5	0	8	110	3	5	CSRF	0	0	0	0	0	3	3	1	0	0
197	Multitract	Male	27	21	Pelvic and calix	Right	1273	1174	14.6	12.3	2.3	0	8	120	3	5	CSRF	0	0	0	0	0	2	2	1	0	0
198	Multitract	Male	55	29	Pelvic and calix	Left	950	1736	14.2	12.7	1.5	0	8	60	2	5	SF	0	0	0	0	0	2	1	3	1	1
199	Multitract	Female	26	27	Pelvic and calix	Right	423	653	13.4	11.3	2.1	0	4	75	3	2	SF	0	0	0	0	0	3	2	1	0	0
200	Multitract	Male	27	26	Pelvic and calix	Right	770	1064	14.8	13.1	1.7	0	3	80	4	2	SF	0	0	0	0	0	2	2	1	0	0
201	Multitract	Male	20	25	Pelvic and calix	Right	1929	1036	16.4	12.8	3.6	0	9	130	2	4	CSRF	0	0	0	0	0	3	2	1	0	0
202	Multitract	Male	54	24	Pelvic and calix	Left	1177	891	14.3	11.7	2.6	1	3	75	3	4	SF	0	0	0	0	0	3	3	1	0	0
203	Multitract	Male	58	28	Pelvic and calix	Right	576	1502	12	11.8	0.2	0	6	70	4	4	SF	0	0	0	0	0	2	1	2	0	0
204	Multitract	Female	41	28	Pelvic and calix	Right	953	1463	13.2	11	2.2	0	3	75	2	5	SF	0	0	0	0	0	3	2	1	0	0
205	Multitract	Male	46	26	Pelvic and calix	Right	369	1456	14.4	13.6	0.8	0	5	45	3	4	SF	0	0	0	0	0	2	1	1	0	0
206	Multitract	Female	57	25	Pelvic and calix	Right	1695	1140	10.2	8.3	1.9	0	6	90	2	3	CSRF	0	1	0	1	1	3	2	2	0	0
207	Multitract	Female	58	24	Pelvic and calix	Right	227	1015	11	10.2	0.8	0	2	70	1	3	SF	0	0	0	0	0	2	0	2	0	0
208	Multitract	Male	47	27	Pelvic and calix	Right	911	741	10.6	9.2	1.4	0	2	65	4	4	SF	0	1	0	1	1	2	2	2	0	0
